# Supplementary material for: Unc-4 acts to promote neuronal identity and development of the take-off circuit in the Drosophila CNS
Source: eLife. 2020 Mar 27;9:e55007. doi: 10.7554/eLife.55007 (PMC7156266; doi:10.7554/eLife.55007)
Supplement: Supplementary file 1. [file elife-55007-supp1.xlsx]

## Sheet: Sheet1
Figure 1
(C) unc-4null /+ females as control; unc-4null /y males as unc-4null
(D) Control : unc-4FRT /+; UAS-FLP/NB7-4-GAL4 (19B03AD;18F07DBD)
NB7-4> unc-4FRT: unc-4FRT /y; UAS-FLP/ NB7-4-GAL4 (19B03AD;18F07DBD)
(E-I) unc-4DBD /+; tubAD; JFRC12-10XUAS-IVS-myr::GFP
Figure 2
(A, C, E, G, I) unc-4 mutants: unc-4DBD /y
(B, D, F, H, I) GAL4 rescue: uncDBD/y; tubAD /10XUAS-IVS-myr::GFP; UAS-unc-4
(I) BAC rescue: uncDBD/y;; PBac(DC335) /+
Figure 3
(A, E) unc-4FRT /+ female as control
(B, F) unc-4FRT /y; sca-GAL4/UAS-FLP
(C, G) unc-4FRT /y; dpnEE-GAL4/UAS-FLP
(D, H) unc-4FRT /y; ato-GAL43.6/UAS-FLP
(I) control: unc-4FRT /+; ato-GAL43.6/UAS-FLP
ato> unc-4FRT: unc-4FRT /y; ato-GAL43.6/UAS-FLP
unc-4 mutant: unc-4DBD /y
(J) control : +/y;10XUAS-IVS-myr::GFP-p10 ; iav-GAL-4K, 10XUAS-IVS-nlstdTomato
unc-4 mutant : unc-4DBD /y;10XUAS-IVS-myr::GFP-p10 ; iav-GAL-4K, 10XUAS-IVS-nlstdTomato
BAC rescue : unc-4DBD /y;10XUAS-IVS-myr::GFP-p10 ; iav-GAL-4K, 10XUAS-IVS-nlstdTomato/ PBac(DC335)
Figure 4
(A) control: unc-4DBD/+;tubAD/+;10XUAS-IVS-myr::GFP/+
unc-4 mutant: unc-4DBD/y;tubAD/+;10XUAS-IVS-myr::GFP/+
(B) control: unc-4AD/+;; ChATDBD /10XUAS-IVS-myr::GFP
unc-4 mutant: unc-4AD/y;; ChATDBD /10XUAS-IVS-myr::GFP
(C) control: unc-4AD/+;VGluTDBD/+;10XUAS-IVS-myr::GFP/+
unc-4 mutant: unc-4DBD/y;VGluTDBD/+;10XUAS-IVS-myr::GFP/+
(D) control: unc-4DBD/+;; gad1AD,10XUAS-IVS-myr::GFP/+
unc-4 mutant: unc-4AD/y;;gad1AD,10XUAS-IVS-myr::GFP/+
(F) BAC rescue: unc-4AD/y;;gad1AD,10XUAS-IVS-myr::GFP/ PBac(DC335)
(G) unc-4 mutant: unc-4AD/y;;gad1AD,10XUAS-IVS-myr::GFP/+
(H) NB7-2 lineage clone: hsFlp, dpn>KDRT-stop-KDRT>Cre:PEST, unc-4null; Act5c>loxP-stop loxP>LexA::p65/R35B12AD; UAS-KD/R28H10DBD
(H-K) unc-4 mutant: unc-4AD/y;;gad1AD,10XUAS-IVS-myr::GFP/+
Figure 5
(A) NB3-2 lineage clone/7B neurons:
Control: hsFlp, dpn>KDRT-stop-KDRT>Cre:PEST; Act5c>loxP-stop loxP>LexA::p65/+; UAS-KD/dbxDBD; eyAD/+
unc-4 mutant:hsFlp, dpn>KDRT-stop-KDRT>Cre:PEST, unc-4null; Act5c>loxP-stop loxP>LexA::p65/+; UAS-KD/dbxDBD; eyAD/+
(B) 12A neurons
Control: uncDBD/+; 10XUAS-IVS-myr::GFP; AP-2AD
unc-4 mutant: uncDBD/y; 10XUAS-IVS-myr::GFP; AP-2AD
(C) NB2-4 lineage clone/18B neurons:
Control: hsFlp, dpn>KDRT-stop-KDRT>Cre:PEST; Act5c>loxP-stop loxP>LexA::p65/+; UAS-KD/Poxn-GAL4.13
unc-4 mutant:hsFlp, dpn>KDRT-stop-KDRT>Cre:PEST, unc-4null; Act5c>loxP-stop loxP>LexA::p65/+; UAS-KD/Poxn-GAL4.13
(D) 23B neurons
Control: uncDBD/+; R77C10AD/10XUAS-IVS-myr::GFP
unc-4 mutant: uncDBD/y; R77C10AD/10XUAS-IVS-myr::GFP
Figure 6
(A) SS20852-GAL4 / 10XUAS-IVS-myr::GFP in attP18;3XUAS‐IVS‐Syt::smGFP‐HA
(B) SS20852-GAL4/hsFlp2::PEST; HA_V5_FLAG-MCFO
(C) dpn>KDRT-stop-KDRT>Cre:PEST; 13XLexAop2-IVS-myr::GFP, Act5c>loxP-stop loxP>LexA::p65/+; UAS-KD/dbxDBD; eyAD/+
(D) dpn>KDRT-stop-KDRT>Cre:PEST, unc-4null; 13XLexAop2-IVS-myr::GFP, Act5c>loxP-stop loxP>LexA::p65/+; UAS-KD/dbxDBD; eyAD/+
(E) unc-4null /+;13XLexAop2-IVS-myr::GFP, Actin5Cp4.6>FRT-stop-FRT>nlsLexAp65/UAS-FLP.D; dbxDBD/+; eyAD/+
(F-G) unc-4null /+;13XLexAop2-IVS-myr::GFP, Actin5Cp4.6>FRT-stop-FRT>nlsLexAp65/UAS-FLP.D; dbxDBD/+; eyAD/+
(H) elav-GAL4C155, hsFLP; FRT42B, tubP-GAL80/FRT42B, UAS-mCD8::GFP
(I) hsFLPop, Tub-GAL80, FRT19A/unc-4null FRT19A;; act>FO>GAL4, UAS-CD8GFP/+
Figure 7
(C) Control:5XUAS-FLP::PEST, unc-4FRT/+; dbxDBD/+; eyAD/+
(D) NB-3-2-GAL4> unc-4FRT:5XUAS-FLP::PEST, unc-4FRT/y; dbxDBD/+; eyAD/+
Figure 1 -Supplemental Figure 1
(A) unc-4AD/+;tubDBD/+;10XUAS-IVS-myr::GFP/+
(B-E, I) unc-4GAL4/+;10XUAS-IVS-myr::GFP/+
(B-E, I) unc-4DBD/+;tubAD/+;10XUAS-IVS-myr::GFP/+
(F) unc-4AD/+;; ChATDBD /10XUAS-IVS-myr::GFP
Figure 7 -Supplemental Figure 1
(A) dbxDBD/10XUAS-IVS-myr::GFP; eyAD
(B, C) hsFlp, dpn>KDRT-stop-KDRT>Cre:PEST; Act5c>loxP-stop loxP>LexA::p65/+; UAS-KD/dbxDBD; eyAD/+
